# Supplementary material for: Astringency Sensitivity to Tannic Acid: Effect of Ageing and Salivary Flow
Source: Preprints.org preprint supplement (doi:10.20944/preprints202103.0624.v1), 2021-03-25
Supplement: Supplementary file 2 [file supplementary]

| **Taste** | **Salty** | **Bitter** | **Sweet** | **Umami** | **Sour** | **Astringent** |
| --- | --- | --- | --- | --- | --- | --- |
| Component | Sodium chloride (Sigma-Aldrich-France) | Leucine  (Dolder Rexim, France) | Sucrose  (Sigma- Aldrich, France) | Sodium glutamate (Merck, France) | DL-Lactic acid (Fluka, France) | Tannic acid (Sigma- Aldrich, France) |
| Concentration (g/L) | 3 | 8 | 15 | 0.6 | 2 | 1.76 |

**Table S1**: Description of the tasting solutions used for the training session
